# Supplementary material for: Transcriptional regulation of Bcl-2 gene by the PR/SET domain family member PRDM10
Source: PeerJ. 2019 May 15;7:e6941. doi: 10.7717/peerj.6941 (PMC6525587; doi:10.7717/peerj.6941)
Supplement: Dataset S3 — Quantitation of ChIP assay of PRDM10 binding to the Bcl-2 P1 promoter in HEK293 cells. Quantitation of ChIP assay of PRDM10 binding to the Bcl-2 P1 promoter in transfected cells [file peerj-07-6941-s004.xlsx]

## Sheet: Sheet1
		IgG			PRDM10
	ChIP in endogenous HEK293 cells	0.004	0.007	0.0085	0.215	0.207	0.25
	ChIP in transfected HEK293 cells.	IgG			flag
	Negative	0.02	0.031	0.017	0.0183	0.033	0.023
	PRDM10	0.03	0.026	0.018	0.56	0.48	0.31
